# Supplementary material
Source: PubMed Central journal article supplement (PMC4883843)
Supplement: kpsb-10-09-1060385-s001.pdf [file kpsb-10-09-1060385-s001.pdf]

# Supplemental Figure 1.

A

| Primer set name     | Sense primer                 | Antisense primer               |
|---------------------|------------------------------|--------------------------------|
| RanGAP1_1           | ATGYTNGTNGARMGNATG           | SWDATNCCRTCRTTCAT              |
| RanGAP1_2           | ATHAARYTNTGGCCNCC            | CCYTCRTCNCNCGTCAT              |
| GeneRacer 5'        | GeneRacer 5' primer          | GGTCTGCCAGCTACAAAGTCGAAAT      |
| GeneRacer 3'        | GATGGTGATGGAAGCTCTGCTGTACAA  | GeneRacer 3' primer            |
| GeneRacer 5' nested | GeneRacer 5' nested primer   | CCTCTTCGGCTTCGATGAAGGATCTT     |
| GeneRacer 3' nested | GCTCTGCTGTACAACTATACGCCAAGA  | GeneRacer 3' nested primer     |
| ACRanGAP1_1         | ACTGAAAAGAGTAGAAATGGAGCAGGAG | GACTGCTAAAAACACACAAGTGCTCTTCAG |
| ACRanGAP1_2         | CAGATTGTTCATGGAGACTGCTCCAGC  | GACTGCTAAAAACACACAAGTGCTCTTCAG |
| ACRanGAP1_3         | ATTCAGGGTACCTGGAGACTGCTCCAGC | TCTCAGGATCCGGACCAAGCAAATCTCTCC |

B

|      |                      |                       |                       |                      |                       |      |
|------|----------------------|-----------------------|-----------------------|----------------------|-----------------------|------|
| 1    | TGGAGCAGGAGGACTGAC   | ATGGTCTGAAGGATGAGAA   | TGCSLGAACCTTTTCAACTAT | TCTGTGAGTCTCCTCCCTG  | AAGCTAGGGTTTCTAAAA    | 100  |
| 101  | ATTGAGGTTTTCATCTCCTC | CCTGAAGCTTAGGGTTTTTA  | AACAATTGAGATTGCTATGG  | AGACTGCTCCAGCTCAGAGT | GATCAACCAAAATCCTTCTC  | 200  |
| 201  | AATCAAGCTCTGCCACCAA  | GCGAAAAAAGCTCGACTGATG | CTTGTAGAAGGGATGACCAA  | AAACTGCTCAACCGAGTCCA | TTTTTTCTAGGAAGTATGGG  | 300  |
| 301  | CTTCTAACCGTAGAAGAAGC | CACTGAACATGCAAAAAACA  | TTGAAGACACATGCTTTAAA  | TCTGCCTGTGAACACTTCGA | TAGAGAGCCAGATGGTGATG  | 400  |
| 401  | GAAGCTCTGCTGTACAATA  | TACGCCAAAAGAACGAGCAA  | GCTCATGCTTGAAGTTCTCA  | AAAAAGGCCCAAATCCAAA  | GAGGAAAAAGATATAATCAT  | 500  |
| 501  | CGATTCTCCAAGCAAAAGG  | TTTTTGACATATCTCAAGGA  | AAAAGATCCTTCATCGAAGC  | GGAAGAGGCCAAAGAGCTTC | TTACCCCACTCACTGAAAA   | 600  |
| 601  | GGAACGGTTACAGTAAAAT  | CATATTCAGCAACAGAAGCT  | TTGGCATTGAAGCTGCTAAG  | CTAGCCGAGCCTATACTAGC | ATCTCTAAAAGATCAACTCA  | 700  |
| 701  | AAGAGGTTGATATTTCCGAC | TTTGTAGCTGGCAGACCTGA  | AGATGAAGCCTTGGAAAGTA  | TGAGAATATTCTCATAGCA  | TTAGAAGGGTGCATTTCTAAA | 800  |
| 801  | CTATTTGAATCTATCCGATA | ATGCTTTGGGCGAGAAAGGT  | GTAAGGGCATTTGGGTGATT  | GTTAAAATCTCAACATAACT | TAGAGGAGCTTTATTTGATG  | 900  |
| 901  | AATGATGGCATATCAGAGGA | AGTAGCTAAGGCTTTGACCG  | AGTTGATCCATCAACTGAT   | AAAATTAAGGTTCTCCATT  | TCATAACAATATGACGGGGG  | 1000 |
| 1001 | ATGAAGGAGCTATTTCAATA | GCTGAACATTTGAAATCATC  | GCCTTTACTAGAAAAATTC   | GATGTTGCTGCAGTAGAGT  | GGATCAGAAGGAGGATTCG   | 1100 |
| 1101 | ACTTGTGTAAGCTTTGAAAG | GTTGCGAGCATTGAAAGAA   | CTGGATTTGAGGGAATAAT   | GTTTGGTGTGGAAGCTGGAT | TAGCTTTAGCAAAAACCTTA  | 1200 |
| 1201 | GAAAAGCTCAATGATATAAG | CGAGTTGATCTAAGCTATT   | TGAACCTAGAAGCAAAAGGA  | GCGATTGAGTGTGGAAGC   | AATAGAGAAAATTTGCGCTA  | 1300 |
| 1301 | AAATTGAAGTTTGGAAATG  | GCTGAAATGACATAACAGT   | GAAAGCTTCAAAAGCCCTGG  | CTTCTTGATTTCATCGAAG  | AAAATGTTGAAGAGCTGGT   | 1400 |
| 1401 | GTTGTCTGAGAAAGAACTGA | AAGATGAAGGGGCTGTTAGG  | ATAGCTACTGCTTTGGAAGA  | TGGCCATGTTGAGCTTAGAG | AAGTGGATTTGAGTAGCAAT  | 1500 |
| 1501 | ATGATTAGGAGAGTTGGTGC | TAGAAGCTTAGCACGTGCAA  | TGGCTAAGGATAAACCAAAA  | TTAAGGATGTTGAATATTA  | TGGGAATTATATTTCCGATG  | 1600 |
| 1601 | AAGGCATTGATGAGGTAAAG | GAGATATTGAAGGAGGATT   | GCTTGGTCCATTTGATGAGA  | ACGATGTTGATGGTGAAGAA | GATGATGGTATGAAGATGA   | 1700 |
| 1701 | AGAAGCTGAAGAAGAAGAAG | AAGAAGAAGAAGAAGAAGAA  | AAAGAAGACGTTGACGCTAA  | GCTTGAGAAGCTTAAAGTTA | ATGACGAGTAAGCAACTATA  | 1800 |
| 1801 | TTTCTATAAAATTATAATGT | TCCAGGGACTACTAATTTGA  | GGGTTTTCAATTTAGCCAGC  | TGCAAAATATTGGCTGGTAT | GTACTATTGTTTTTAGACTG  | 1900 |
| 1901 | AACTATGAGAGTCTGAAGT  | AAGAGCACTTGTGTGTTTT   | AGCAGTC               |                      |                       | 1947 |

C

|                        |                                                                                                                                                                                                                               |     |
|------------------------|-------------------------------------------------------------------------------------------------------------------------------------------------------------------------------------------------------------------------------|-----|
| Allium cepa            | METAQAQSDQPKRSRIRLWPFSEKTRLLVEGTRNLSTESIPSRKYGLTVEATEHARRIEDTCERSACEHREDPDGDGSSAVOLYAKESKMLMLVLRKGGPKSKEEKDIIIDS...                                                                                                           | 117 |
| Arabidopsis thaliana 1 | MDHS.AKTTNVRVLSVQVPSKSTRLLVEMTRNITTPSPSRKYGLLSVEPAEQDARKRIBEDLAFATANKHFQNEPPDGDGSSAVOLYAKESKMLMLVLRKGGPKSKEEKDIIIDS...                                                                                                        | 116 |
| Arabidopsis thaliana 2 | MADI.LDSRPH.ABSIKWVPSLPTKALERITNNFSSKTRIFPKVQSLTKDQATENAKRIBEDLAFATANKHFQNEPPDGDGSSAVOLYAKESKMLMLVLRKGGPKSKEEKDIIIDS...                                                                                                       | 118 |
| Medicago truncatula    | MDST.VPSYQHRRTSKIKWVPSQSTRSLVGRMARNLTPSPSPSRKYGLLNKYBAEKDARKRIBEDLAFATANKHFQNEPPDGDGSSAVOLYAKESKMLMLVLRKGGPKSKEEKDIIIDS...                                                                                                    | 119 |
| Oryza sativa           | MDST.KQDFQPRRTSKIKWVPSQSTRSLVGRMARNLTPSPSPSRKYGLLNKYBAEKDARKRIBEDLAFATANKHFQNEPPDGDGSSAVOLYAKESKMLMLVLRKGGPKSKEEKDIIIDS...                                                                                                    | 119 |
| Zea mays               | MDS..AQDFQPRRTSKIKWVPSQSTRSLVGRMARNLTPSPSPSRKYGLLNKYBAEKDARKRIBEDLAFATANKHFQNEPPDGDGSSAVOLYAKESKMLMLVLRKGGPKSKEEKDIIIDS...                                                                                                    | 118 |
| Vitis vinifera         | MDST.AQNFQHRKRSKIKWVPSQSTRSLVGRMARNLTPSPSPSRKYGLLNKYBAEKDARKRIBEDLAFATANKHFQNEPPDGDGSSAVOLYAKESKMLMLVLRKGGPKSKEEKDIIIDS...                                                                                                    | 119 |
| Consensus              | m s k w p s t r l n i k y l a a k i e f a e p d g d g s a v y a k e s k l m l v l r k g g p k s k e e k d i i i d s                                                                                                           |     |
| Allium cepa            | .EKQKVDISQKRSRFTAEAEAKLLTPLTEKENCYSKIFSNRSFGLPAKLAELIASKQQLVEVDSDVAGREBEALHVMWFSSALGGLLNVLNSNNAAGEKGRAFASLLI                                                                                                                  | 236 |
| Arabidopsis thaliana 1 | ...DVFQDISQKRSRFTAEAEAKLLTPLTEKENCYSKIFSNRSFGLPAKLAELIASKQQLVEVDSDVAGREBEALHVMWFSSALGGLLNVLNSNNAAGEKGRAFASLLI                                                                                                                 | 233 |
| Arabidopsis thaliana 2 | SREFFDISQKRSRFTAEAEAKLLTPLTEKENCYSKIFSNRSFGLPAKLAELIASKQQLVEVDSDVAGREBEALHVMWFSSALGGLLNVLNSNNAAGEKGRAFASLLI                                                                                                                   | 238 |
| Medicago truncatula    | AAVEVDISQKRSRFTAEAEAKLLTPLTEKENCYSKIFSNRSFGLPAKLAELIASKQQLVEVDSDVAGREBEALHVMWFSSALGGLLNVLNSNNAAGEKGRAFASLLI                                                                                                                   | 238 |
| Oryza sativa           | ESADVDISQKRSRFTAEAEAKLLTPLTEKENCYSKIFSNRSFGLPAKLAELIASKQQLVEVDSDVAGREBEALHVMWFSSALGGLLNVLNSNNAAGEKGRAFASLLI                                                                                                                   | 239 |
| Zea mays               | VSADTVDISQKRSRFTAEAEAKLLTPLTEKENCYSKIFSNRSFGLPAKLAELIASKQQLVEVDSDVAGREBEALHVMWFSSALGGLLNVLNSNNAAGEKGRAFASLLI                                                                                                                  | 238 |
| Vitis vinifera         | SLELTVDISQKRSRFTAEAEAKLLTPLTEKENCYSKIFSNRSFGLPAKLAELIASKQQLVEVDSDVAGREBEALHVMWFSSALGGLLNVLNSNNAAGEKGRAFASLLI                                                                                                                  | 239 |
| Consensus              | dis g r fi ea ll pl n i f n s r s f g l p a a l s k q l e v d s d f a g r e e a v m f s a l g l n s n a g e k g r a f a s l l i                                                                                               |     |
| Allium cepa            | KSCHLLELYMNDGISSEAKAVLTELPSDTRKLVLFHNNMTGDEGAISIAELLKSEPLENFRCSSTRVSGGGALVPAIKGCEHLKDLDRDNMFGVEAGLALSKTLEKINDISE                                                                                                              | 356 |
| Arabidopsis thaliana 1 | NSCHLLELYMNDGISSEAKAVLTELPSDTRKLVLFHNNMTGDEGAISIAELLKSEPLENFRCSSTRVSGGGALVPAIKGCEHLKDLDRDNMFGVEAGLALSKTLEKINDISE                                                                                                              | 353 |
| Arabidopsis thaliana 2 | KSLSLELYMNDGISSEAKAVLTELPSDTRKLVLFHNNMTGDEGALAIASVVRKSEPLENFRCSSTRVSGGGALVPAIKGCEHLKDLDRDNMFGVEAGLALSKTLEKINDISE                                                                                                              | 358 |
| Medicago truncatula    | KSCHLLELYMNDGISSEAKAVLTELPSDTRKLVLFHNNMTGDEGAFALAVVMKRSSEPLENFRCSSTRVSGGGALVPAIKGCEHLKDLDRDNMFGVEAGLALSKTLEKINDISE                                                                                                            | 358 |
| Oryza sativa           | KSCHLLELYMNDGISSEAKAVLTELPSDTRKLVLFHNNMTGDEGAMFIAEMVVRKSEPLENFRCSSTRVSGGGALVPAIKGCEHLKDLDRDNMFGVEAGLALSKTLEKINDISE                                                                                                            | 359 |
| Zea mays               | KSCHLLELYMNDGISSEAKAVLTELPSDTRKLVLFHNNMTGDEGAMFIAEMVVRKSEPLENFRCSSTRVSGGGALVPAIKGCEHLKDLDRDNMFGVEAGLALSKTLEKINDISE                                                                                                            | 358 |
| Vitis vinifera         | KSCHLLELYMNDGISSEAKAVLTELPSDTRKLVLFHNNMTGDEGAFALAVVMKRSSEPLENFRCSSTRVSGGGALVPAIKGCEHLKDLDRDNMFGVEAGLALSKTLEKINDISE                                                                                                            | 359 |
| Consensus              | s chlllely mndgis seakavl tel psdtrklvlfhnnmtgdega is iaellk seple n frcs str vsggal vpaikgcehl kdlrdn mfgveagl al sktlek indise                                                                                              |     |
| Allium cepa            | LYSMLNLEDEKATAVLEAEKYLKLELVMAGNDITVTKASKALASCISSKMKLKLKLSENELKDEGAVRATADLGHVREVDLSSNMIRRVGARSILRAMAKDRBKLTMNLING                                                                                                              | 476 |
| Arabidopsis thaliana 1 | LYSMLNLEDEKATAVLEAEKYLKLELVMAGNDITVTKASKALASCISSKMKLKLKLSENELKDEGAVRATADLGHVREVDLSSNMIRRVGARSILRAMAKDRBKLTMNLING                                                                                                              | 471 |
| Arabidopsis thaliana 2 | LYSMLNLEDEKATAVLEAEKYLKLELVMAGNDITVTKASKALASCISSKMKLKLKLSENELKDEGAVRATADLGHVREVDLSSNMIRRVGARSILRAMAKDRBKLTMNLING                                                                                                              | 477 |
| Medicago truncatula    | LYSMLNLEDEKATAVLEAEKYLKLELVMAGNDITVTKASKALASCISSKMKLKLKLSENELKDEGAVRATADLGHVREVDLSSNMIRRVGARSILRAMAKDRBKLTMNLING                                                                                                              | 478 |
| Oryza sativa           | LYSMLNLEDEKATAVLEAEKYLKLELVMAGNDITVTKASKALASCISSKMKLKLKLSENELKDEGAVRATADLGHVREVDLSSNMIRRVGARSILRAMAKDRBKLTMNLING                                                                                                              | 476 |
| Zea mays               | LYSMLNLEDEKATAVLEAEKYLKLELVMAGNDITVTKASKALASCISSKMKLKLKLSENELKDEGAVRATADLGHVREVDLSSNMIRRVGARSILRAMAKDRBKLTMNLING                                                                                                              | 477 |
| Vitis vinifera         | LYSMLNLEDEKATAVLEAEKYLKLELVMAGNDITVTKASKALASCISSKMKLKLKLSENELKDEGAVRATADLGHVREVDLSSNMIRRVGARSILRAMAKDRBKLTMNLING                                                                                                              | 478 |
| Consensus              | y s m l n l e d e k a t a v l e a e k y l k l e l v m a g n d i t v t k a s k a l a s c i s s k m k l k l k l s e n e l k d e g a v r a t a d l g h v r e v d l s s n m i r r v g a r s i l r a m a k d r b k l t m n l i n g |     |
| Allium cepa            | NHSBCEBVEKLELK...EDLSEEDVNTVTEBEDDGEDDEAESEEESEEEEEKEDVAKLEKLVNDE..                                                                                                                                                           | 544 |
| Arabidopsis thaliana 1 | NHSBCEBVEKLELK...EDLSEEDVNTVTEBEDDGEDDEAESEEESEEEEEKEDVAKLEKLVNDE..                                                                                                                                                           | 535 |
| Arabidopsis thaliana 2 | NHSBCEBVEKLELK...KSPDLGALDNDPEGEDD...DEEEDDEENGENGNGEESKUNLEVENQED..                                                                                                                                                          | 543 |
| Medicago truncatula    | NHSBCEBVEKLELK...NSPDLGALDNDPEGEDD...EAEEN..SDN...DELESKLEL...E..                                                                                                                                                             | 535 |
| Oryza sativa           | NHSBCEBVEKLELK...NSPDLGALDNDPEGEDD...EAEEN..SDN...DELESKLEL...E..                                                                                                                                                             | 544 |
| Zea mays               | NHSBCEBVEKLELK...NSPDLGALDNDPEGEDD...EAEEN..SDN...DELESKLEL...E..                                                                                                                                                             | 540 |
| Vitis vinifera         | NHSBCEBVEKLELK...NSPDLGALDNDPEGEDD...EAEEN..SDN...DELESKLEL...E..                                                                                                                                                             | 541 |
| Consensus              | n h s b c e b v e k l e l k . . . e d l s e e d v n t v t e b e d d g e d d e a e s e e e s e e e e e k e d v a k l e k l v n d e . .                                                                                         |     |

**Supplemental Figure 1.** List of PCR primers for cloning of the gene for an onion RanGAP homolog, the nucleotide sequence of its cDNA and deduced amino acid sequence comparison of plant RanGAP-like proteins. (A) List of PCR primer sets. (B) Nucleotide sequence of AcRanGAP including 3' noncoding regions and 5' noncoding regions determined in this study. A start codon (ATG) and a stop codon (TAA) in AcRanGAP gene are shown in red. (C) Alignment of deduced amino acid sequences of seven RanGAP-like proteins from six plant species. Sequences were aligned using DNAMAN (Lynnon Co.). Black, dark gray and light gray boxes indicate identical, six similar or four to five similar residues, respectively. The accession numbers for the sequence shown in (C) are as follows; *Allium cepa* (LC05995), *Arabidopsis thaliana* 1 (AF214559), *Arabidopsis thaliana* 2 (AF214560), *Medicago truncatula* (BT052909), *Oryza sativa* (AK242655), *Zea mays* (EU960259), and *Vitis vinifera* (A5AWW1).
